# Supplementary material for: Management of Pyrenophora teres f. teres, the Causal Agent of Net Form Net Blotch of Barley, in A Two-Year Field Experiment in Central Italy
Source: MDPI journal article supplement (doi:10.3390/pathogens11030291), 2022-02-24
Supplement: s1 [file s1]

# Management of *Pyrenophora teres* f. *teres*, the causal agent of net form net blotch of barley, in a two-year field experiment in central Italy

Francesco Tini, Lorenzo Covarelli, Giacomo Ricci, Emilio Balducci, Maurizio Orfei, Giovanni Beccari

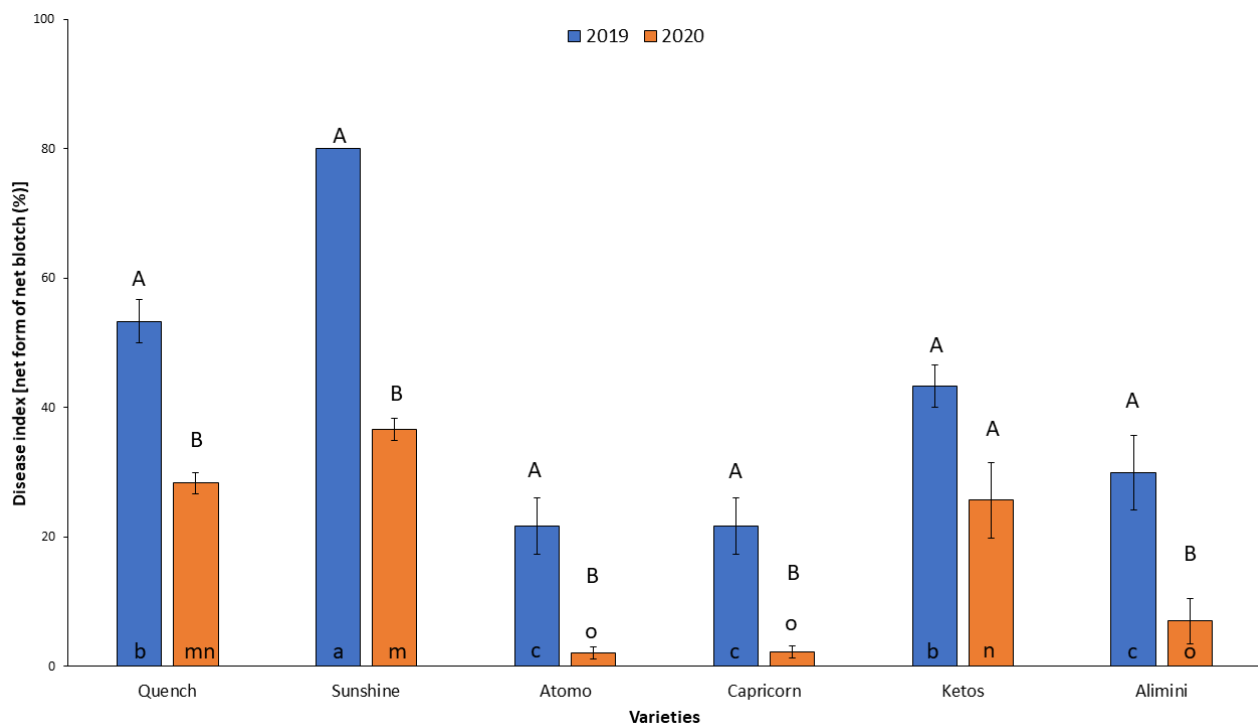

**Figure S1.** Average (three replicates) of disease index [net form net blotch symptoms (%)] observed during 2019 and 2020 on the untreated controls of the six barley varieties. Within the same year (a – c; m – o) or between the years (A – B), means with the same letters are not significantly different at  $p \leq 0.05$  based on Duncan's multiple comparison test.

**Table S1.** Primers used in PCR assays and qPCR analysis.

| Primer   | Sequence (5'-3')          | Size   | Annealing<br>T(°C) | Used in this<br>study | References                 |
|----------|---------------------------|--------|--------------------|-----------------------|----------------------------|
| ITS1     | TCCGTAGGTGAACCTGC<br>GG   | 290 bp | 56                 | PCR                   | White et al.,<br>1990      |
| ITS4     | TCCTCCGCTTATTGATAT<br>GC  |        |                    |                       |                            |
| PttQ4-F  | CGTCCCGCCGAAATTTT<br>GTA  | 173 bp | 60                 | PCR/qPCR              | Poudel et al.,<br>2017     |
| PttQ4-R  | CAAGGACTTACGCGCTC<br>AAA  |        |                    |                       |                            |
| PtmQ10-F | TGCTGTGGACTTAGACG<br>AGG  | 260 bp | 62                 | PCR                   | Pudel et al.,<br>2017      |
| PtmQ10-R | TGGGGATCCTTGACCAA<br>CTC  |        |                    |                       |                            |
| Hor1-F   | TCTCTGGGTTTGAGGGT<br>GAC  |        | 61                 | qPCR                  | Nicolaisen et<br>al., 2009 |
| Hor2-R   | GGCCCTTGTACCAGTCA<br>AGGT |        |                    |                       |                            |
